# Supplementary material
Source: publisher site journal article supplement (https://www.dovepress.com/article/440332)
Supplement: Supplementary file 1 [file get_supplementary_file.php]

Method file : <method not saved>  
 Information : Default Method  
 Data File : D:\GFF\20231123 AMEISUBIAOQU.SD Created : 11/23/23 15:42:54

Overlaid Spectra:

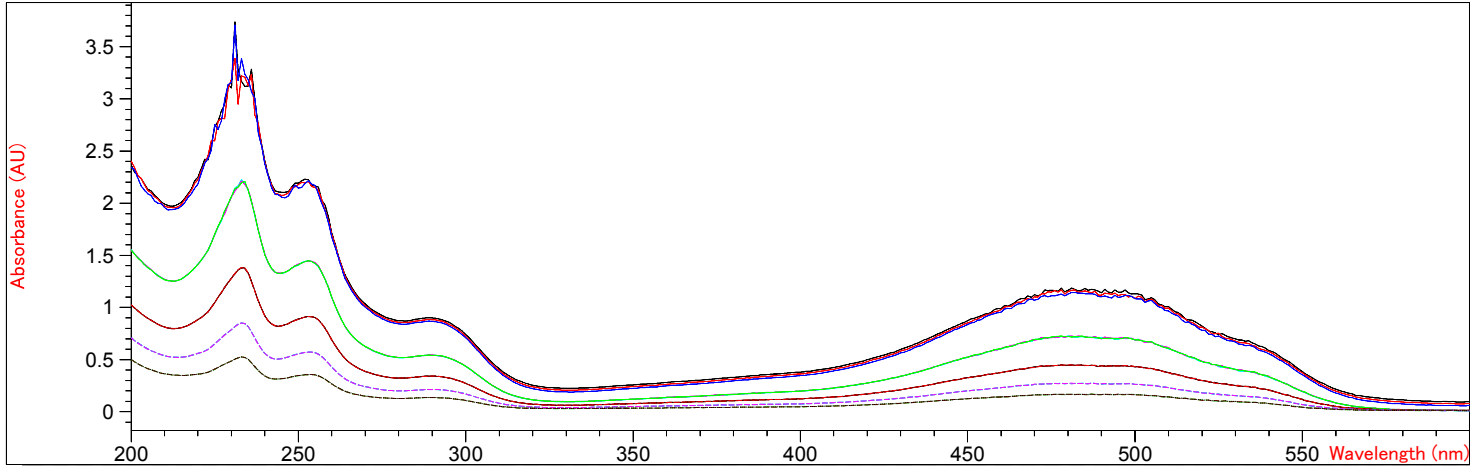

| # | Name   | Abs<480nm> | #  | Name    | Abs<480nm> |
|---|--------|------------|----|---------|------------|
| 1 | 0.06   | 1.16510    | 9  |         | 0.44811    |
| 2 |        | 1.15380    | 10 | 0.01296 | 0.27274    |
| 3 |        | 1.12980    | 11 |         | 0.27363    |
| 4 | 0.036  | 0.72642    | 12 |         | 0.27449    |
| 5 |        | 0.72424    | 13 | 0.00776 | 0.16771    |
| 6 |        | 0.72307    | 14 |         | 0.16849    |
| 7 | 0.0216 | 0.44564    | 15 |         | 0.16731    |
| 8 |        | 0.44485    |    |         |            |

Report generated by : admin

Signature: .....

\*\*\* End Fixed Wavelength Report \*\*\*

Figure S1. UV absorption spectra of DOX solutions with different concentrations in the wavelength range of 200-600nm when making standard curves.

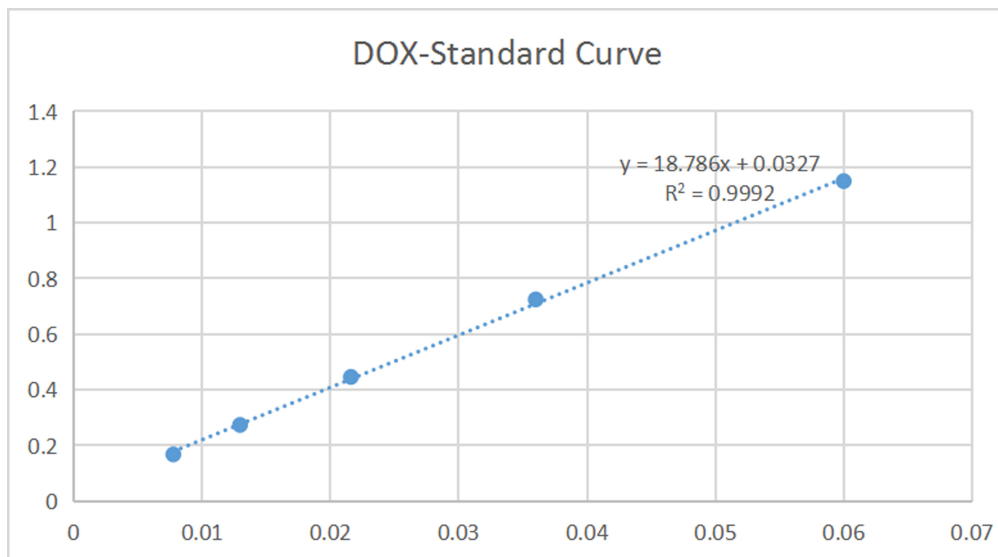

Figure S2. The standard curve of DOX.

Method file : <method not saved>  
 Information : Default Method  
 Data File : <data not saved>

Overlaid Spectra:

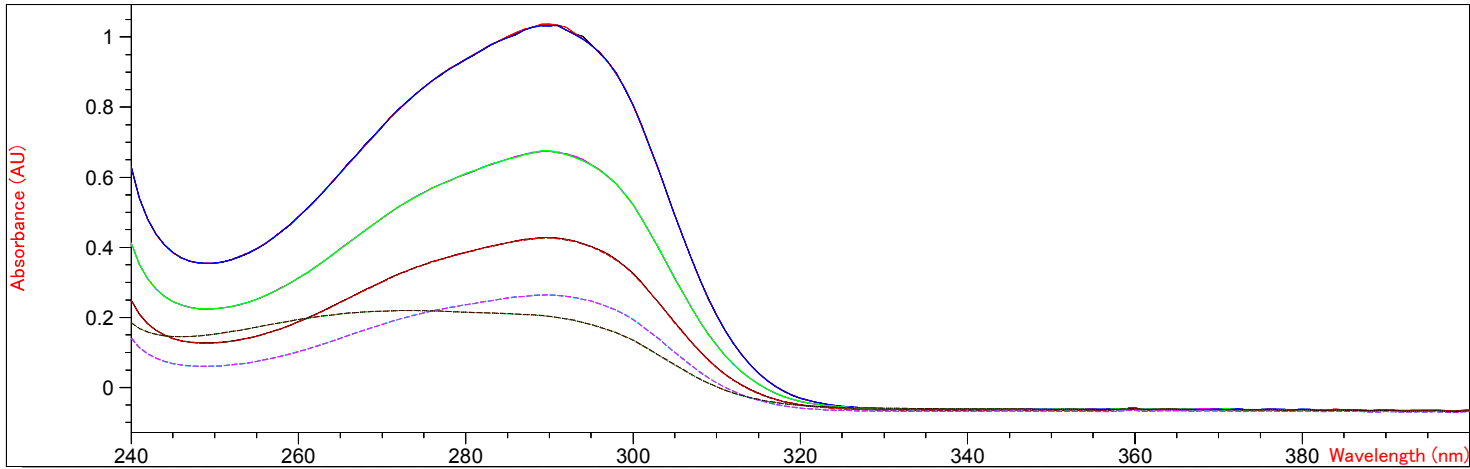

| # | Name | Abs<290nm> | #  | Name | Abs<290nm> |
|---|------|------------|----|------|------------|
| 1 |      | 1.03420    | 9  |      | 0.42709    |
| 2 |      | 1.03770    | 10 |      | 0.26443    |
| 3 |      | 1.03170    | 11 |      | 0.26486    |
| 4 |      | 0.67538    | 12 |      | 0.26395    |
| 5 |      | 0.67448    | 13 |      | 0.20343    |
| 6 |      | 0.67521    | 14 |      | 0.20310    |
| 7 |      | 0.42825    | 15 |      | 0.20244    |
| 8 |      | 0.42738    |    |      |            |

Report generated by : admin

Signature: .....

\*\*\* End Fixed Wavelength Report \*\*\*

Figure S3. Uv absorption spectra of 1-MT solutions with different concentrations in the wavelength range of 240-400nm when making standard curves.

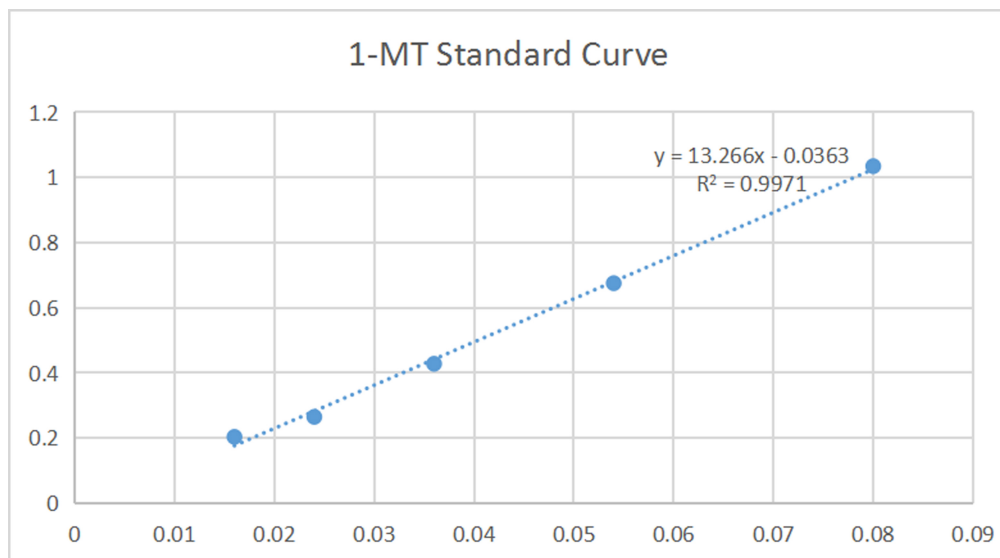

Figure S4. The standard curve of 1-MT.

Method file : <method not saved>  
 Information : Default Method  
 Data File : D:\GFF\DOX-1-MT EXP-2.SD Created : 11/23/23 19:44:13

Overlaid Spectra:

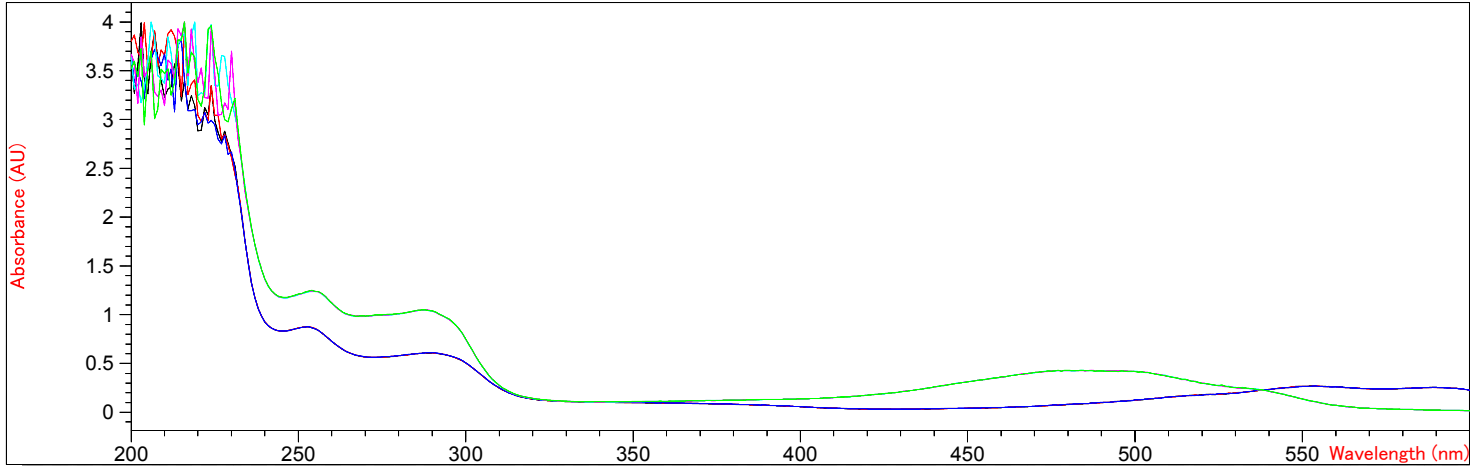

| # | Name             | Abs<290nm> | Abs<480nm> |
|---|------------------|------------|------------|
| 1 | drug export-1-MT | 0.60783    | 7.9755E-2  |
| 2 | drug export-1-MT | 0.60862    | 8.1250E-2  |
| 3 | drug export-1-MT | 0.60959    | 8.1372E-2  |
| 4 | drug export-DOX  | 1.03700    | 0.42814    |
| 5 | drug export-DOX  | 1.03840    | 0.42779    |
| 6 | drug export-DOX  | 1.04090    | 0.42914    |

Report generated by : admin

Signature: .....

\*\*\* End Fixed Wavelength Report \*\*\*

Figure S5. Uv absorption spectra of DOX and 1-MT Determination of solubility of supernatant in the wavelength range of 200-600nm.

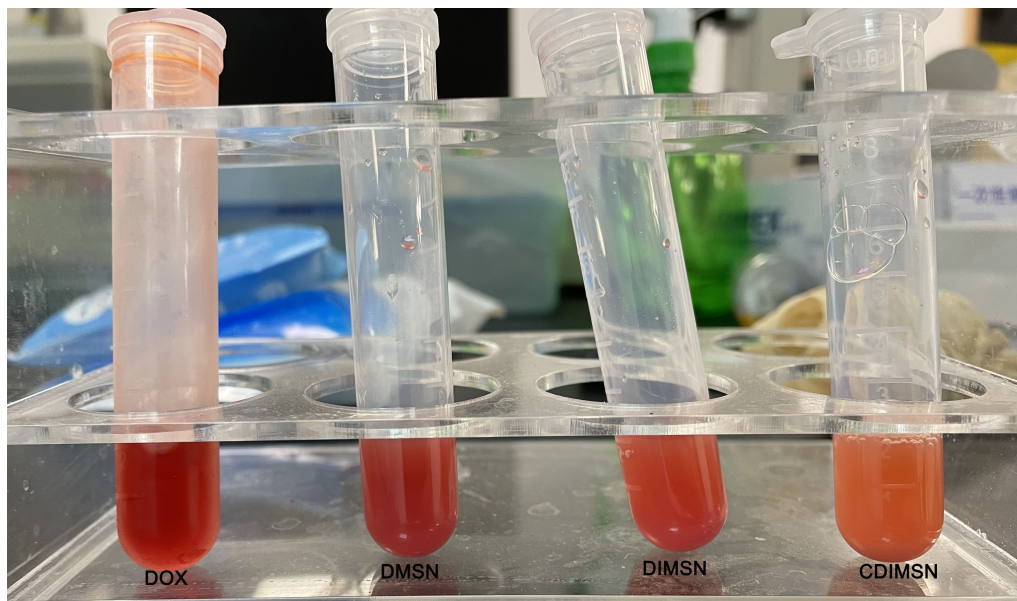

Figure S6. The solution appearance of DOX, DMSN, DIMSN and CDIMSN.

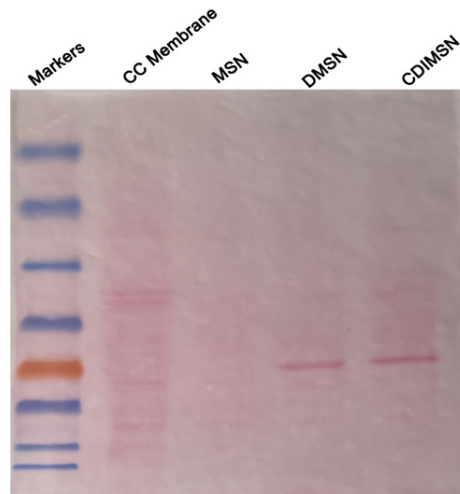

Figure S7. Western blot analysis protein of Tumor cell membrane and CDIMSN.
